# Supplementary material for: A hybrid of MIL-53(Fe) and conductive sulfide as a synergistic electrocatalyst for the oxygen evolution reaction
Source: Royal Society of Chemistry journal article supplement (doi:10.1039/d0ta01912g), 2020-01-01
Supplement: d0ta01912g1.pdf [file d0ta01912g1.pdf]

## Supporting Information for

### **A hybrid coupling of MIL-53(Fe) and conductive sulfide as a synergistic electrocatalyst for oxygen evolution reaction**

Fang Wu,<sup>a</sup> Xiaoxue Guo,<sup>a</sup> Qinghua Wang,<sup>c</sup> Suwei Lu,<sup>b</sup> Jinling Wang,<sup>a</sup> Yubing Hu,<sup>a</sup> Gazi Hao,<sup>a</sup> Qiulin Li,<sup>a</sup> Min-Quan Yang,<sup>\*b</sup> Wei Jiang<sup>\*a</sup>

E-mail: [superfine\\_jw@126.com](mailto:superfine_jw@126.com); [yangmq@fjnu.edu.cn](mailto:yangmq@fjnu.edu.cn)

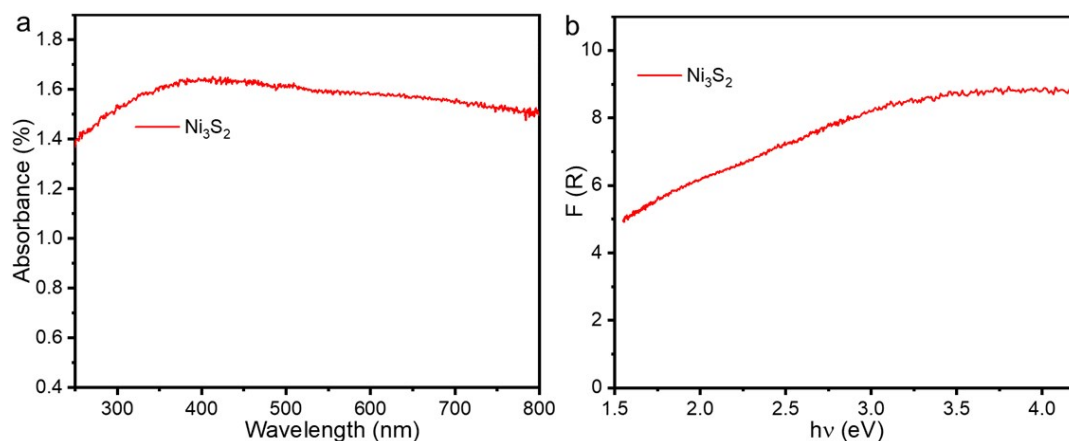

**Fig. S1** UV-visible diffuse reflectance spectra (DRS) of the Ni<sub>3</sub>S<sub>2</sub> sample (a); and the plot of transformed Kubelka–Munk function versus the energy of light (b).

**Note:** Fig. S1 shows the UV-visible diffuse reflectance spectroscopy (DRS) of Ni<sub>3</sub>S<sub>2</sub>, which is an effective technique for analyzing the bandgap of the material. The result reveals that the Ni<sub>3</sub>S<sub>2</sub> has a broadband light absorption in the UV-visible range, without absorption edge. Correspondingly, the band gap of the Ni<sub>3</sub>S<sub>2</sub> is calculated from the plot of the transformed Kubelka–Munk function versus the energy of light. No obvious bandgap is observed. The result is well consistent with the theoretical calculation, demonstrating the metallic characteristic of the Ni<sub>3</sub>S<sub>2</sub>.<sup>S1-S3</sup>

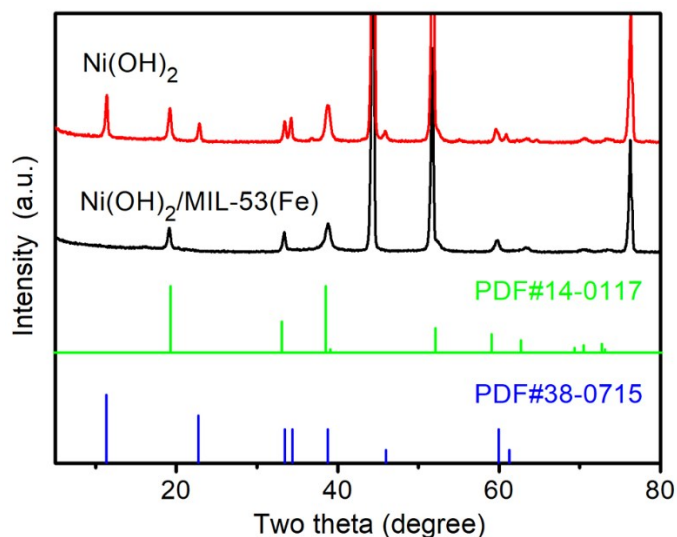

**Fig. S2** XRD patterns of  $\text{Ni(OH)}_2$ ,  $\text{Ni(OH)}_2/\text{MIL-53(Fe)}$ .

**Note:** As can be seen from **Fig. S2**, the diffraction peaks of the bare  $\text{Ni(OH)}_2$  are matched with the standard  $\alpha\text{-Ni(OH)}_2$  (JCPDS No. 38-0715) and  $\beta\text{-Ni(OH)}_2$  (JCPDS No. 14-0117). In comparison, the XRD spectrum of the  $\text{Ni(OH)}_2/\text{MIL-53(Fe)}$  only shows the characteristic peaks of  $\beta\text{-Ni(OH)}_2$ . The disappearance of  $\alpha\text{-Ni(OH)}_2$  diffraction peaks can be ascribed to the phase transformation of  $\alpha\text{-Ni(OH)}_2$  to  $\beta\text{-Ni(OH)}_2$  in DMF solution. This is because DMF is a basic solvent.<sup>S4,S5</sup> Especially, it will decompose to generate amine under hydrothermal condition,<sup>S6</sup> which can further enhance the alkalinity of the solution. Meanwhile,  $\alpha\text{-Ni(OH)}_2$  is very unstable in alkali and can quickly transform into the  $\beta$ -phase.<sup>S7</sup> Therefore, for the synthesis of  $\text{Ni(OH)}_2/\text{MIL-53(Fe)}$ , after the hydrothermal treatment in DMF solution, only  $\beta\text{-Ni(OH)}_2$  is obtained.

Notably, despite that the phase of nickel hydroxide in bare  $\text{Ni(OH)}_2$  and  $\text{Ni(OH)}_2/\text{MIL-53(Fe)}$  is different, it has no critical influence on the activity improvement between final products of  $\text{Ni}_3\text{S}_2$  and  $\text{Ni}_3\text{S}_2/\text{MIL-53(Fe)}$ . Because after sulfurization, the phase of nickel sulfide in bare  $\text{Ni}_3\text{S}_2$  and hybrid  $\text{Ni}_3\text{S}_2/\text{MIL-53(Fe)}$  is the same.

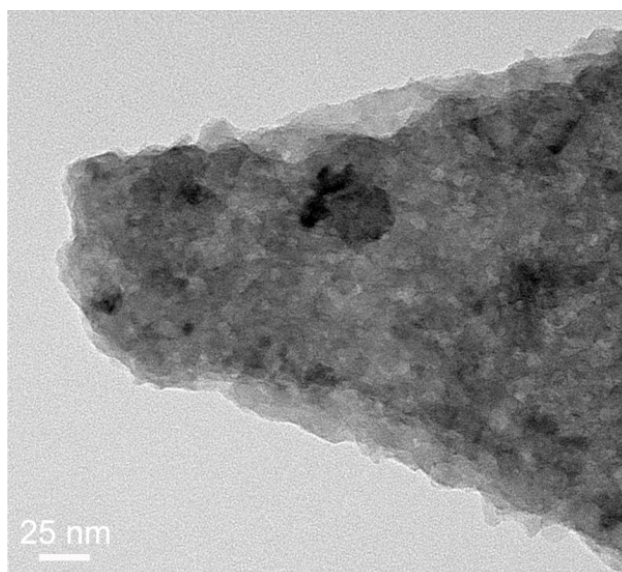

**Fig. S3** TEM image of  $\text{Ni}_3\text{S}_2$ .

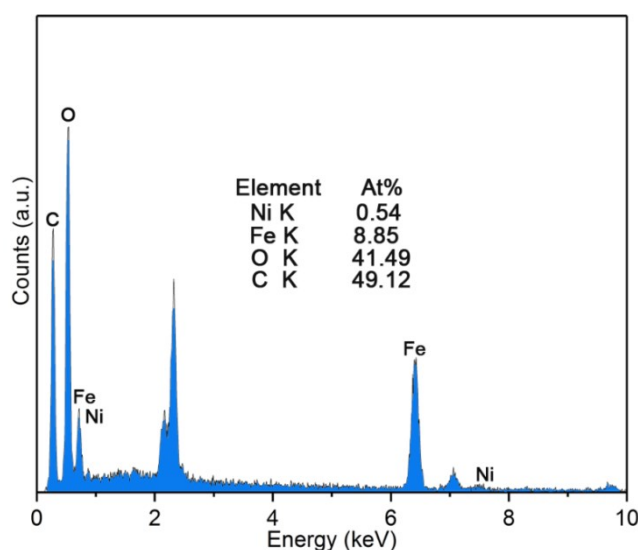

**Fig. S4** SEM-EDX spectrum of MIL-53(Fe) powder collected from the bottom of autoclave.

**Note:** To verify that the released  $\text{Ni}^{2+}$  is included into the formation of MOFs during the synthesis of  $\text{Ni}_3\text{S}_2/\text{MIL-53(Fe)}$ , SEM-EDX and ICP measurements of MIL-53(Fe) powder collected from the bottom of autoclave are performed. As shown in **Fig. S4**, The SEM-EDX spectrum shows an obvious Ni peak of the MIL-53(Fe) powder. The Ni/Fe atomic ratio is calculated to be 1:16.4. ICP analysis of the as-synthesized MIL-53(Fe) powder also verifies the presence of Ni, with a Ni/Fe molar ratio of about 1:16. Since that no extra Ni source is introduced during the hydrothermal process, the result confirms that the released  $\text{Ni}^{2+}$  is included into the formation of the MOF.

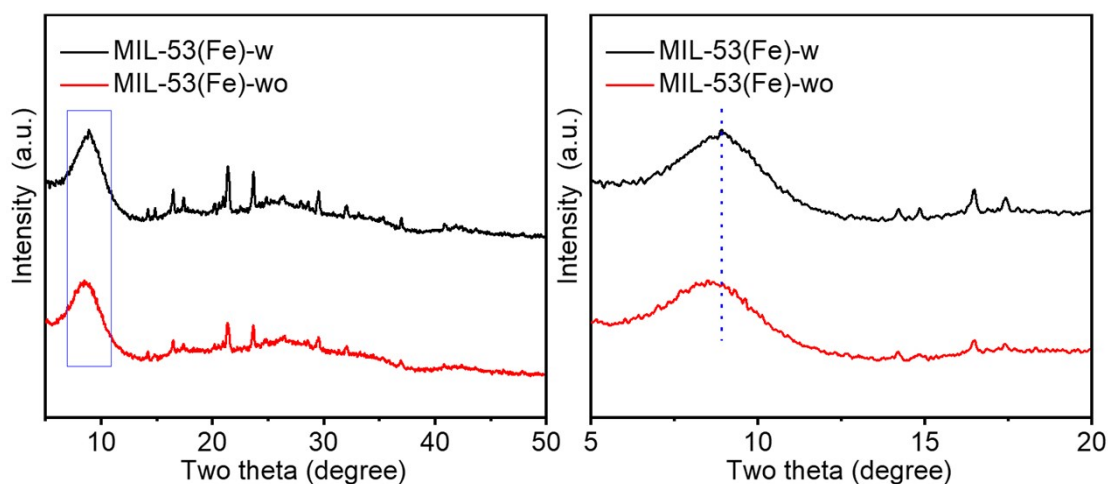

**Fig. S5** XRD patterns of MIL-53(Fe) powder obtain with the synthesis of hybrid  $\text{Ni}_3\text{S}_2/\text{MIL-53(Fe)}$  (-w) and MIL-53(Fe) alone (-wo).

**Note:** To verify that the released  $\text{Ni}^{2+}$  is able to coordinate with the organic ligand instead of being adsorbed into MIL-53, XRD analyses of the MIL-53(Fe)-w powder (obtained with the presence of  $\text{Ni}_3\text{S}_2$ ) and its counterpart of MIL-53(Fe)-wo (obtained without the presence of  $\text{Ni}_3\text{S}_2$ ) collected from the bottom of autoclave are performed. As shown in **Fig. S5**, the XRD pattern of the MIL-53(Fe)-w shows similar diffraction peaks as that of MIL-53(Fe)-wo, except that the characteristic peak of MIL-53(Fe) at  $\sim 8.8^\circ$  shifts to high  $2\theta$  value. This shift can be ascribed to the incorporation of Ni ions into the MIL-53(Fe), which has been commonly observed in bimetal MOFs.<sup>S8,S9</sup> Therefore, in combine the XRD analysis with the SEM-EDX and ICP characterizations, it can be concluded that  $\text{Ni}^{2+}$  is included into the formation of MIL-53(Fe) MOF.

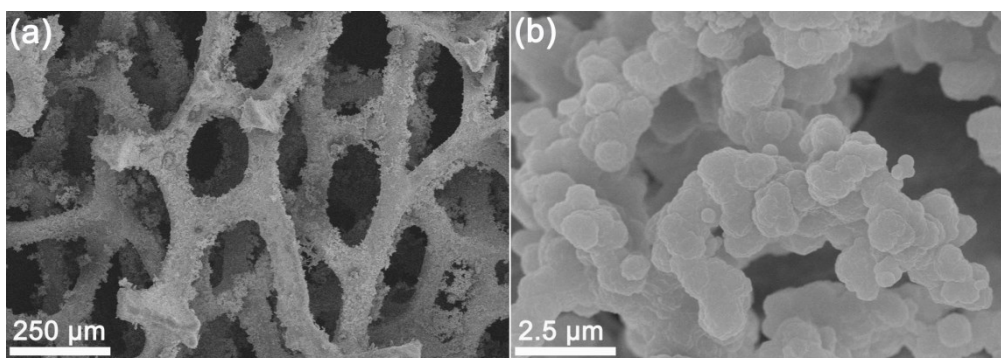

**Fig. S6** SEM images of MIL-53(Fe).

**Note:** Fig. S6 shows the SEM images of the MIL-53(Fe)/NF. It reveals that the surface of the NF is covered by plenty of large MIL-53(Fe) particles after the hydrothermal process, which are severely agglomerated.

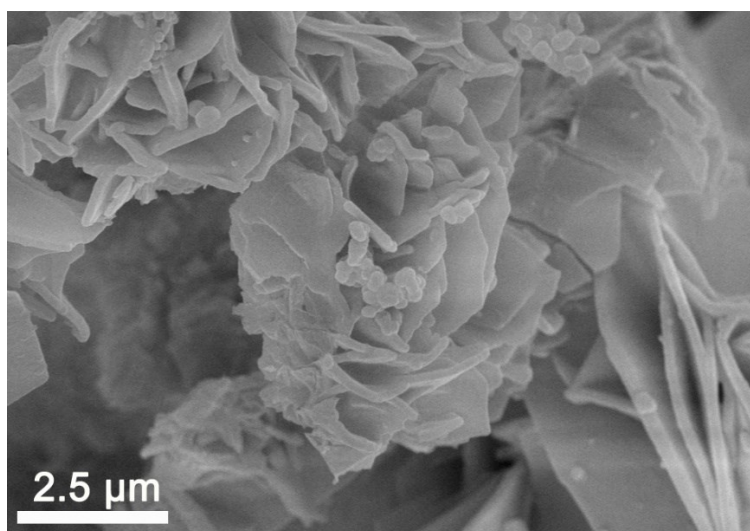

**Fig. S7** SEM image of Ni(OH)<sub>2</sub>/MIL-53(Fe).

**Note:** Fig. S7 shows the SEM images of the Ni(OH)<sub>2</sub>/MIL-53(Fe). It suggests that the surface of the Ni(OH)<sub>2</sub> is covered by a layer of MIL-53(Fe) after the hydrothermal process.

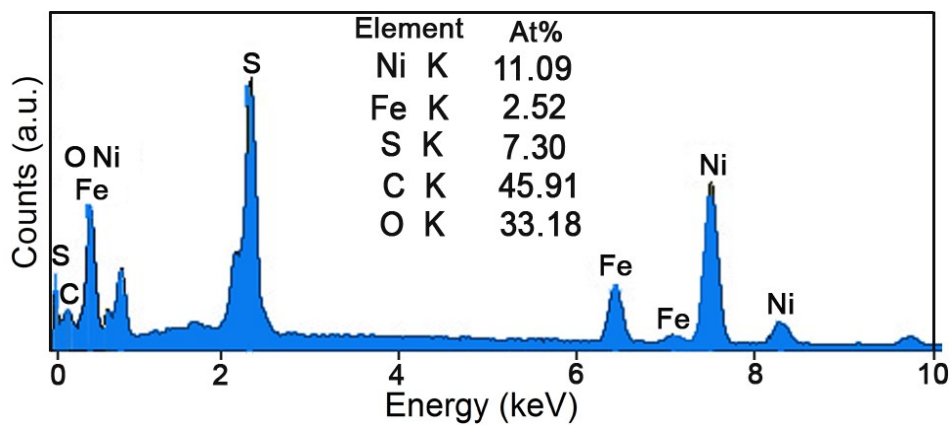

**Fig. S8** SEM-EDX spectrum of  $\text{Ni}_3\text{S}_2/\text{MIL-53(Fe)}$ .

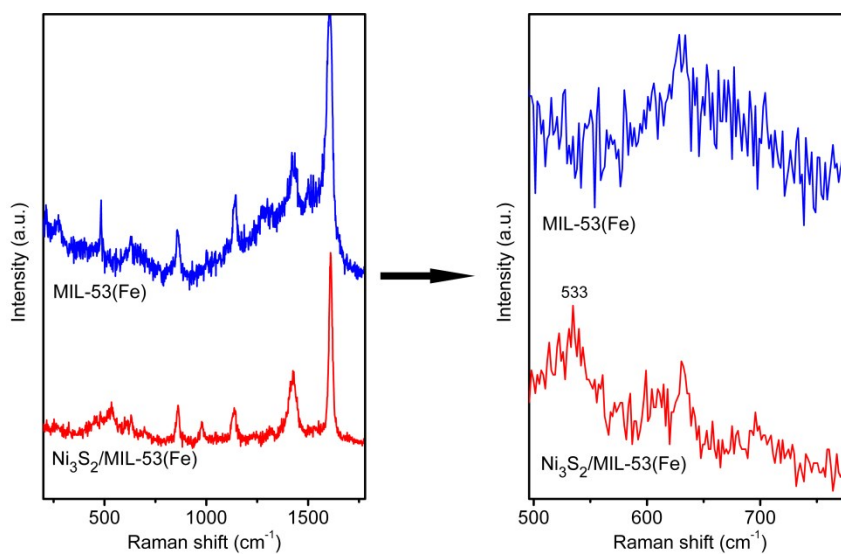

**Fig. S9** Raman spectra of MIL-53(Fe) and  $\text{Ni}_3\text{S}_2/\text{MIL-53(Fe)}$ .

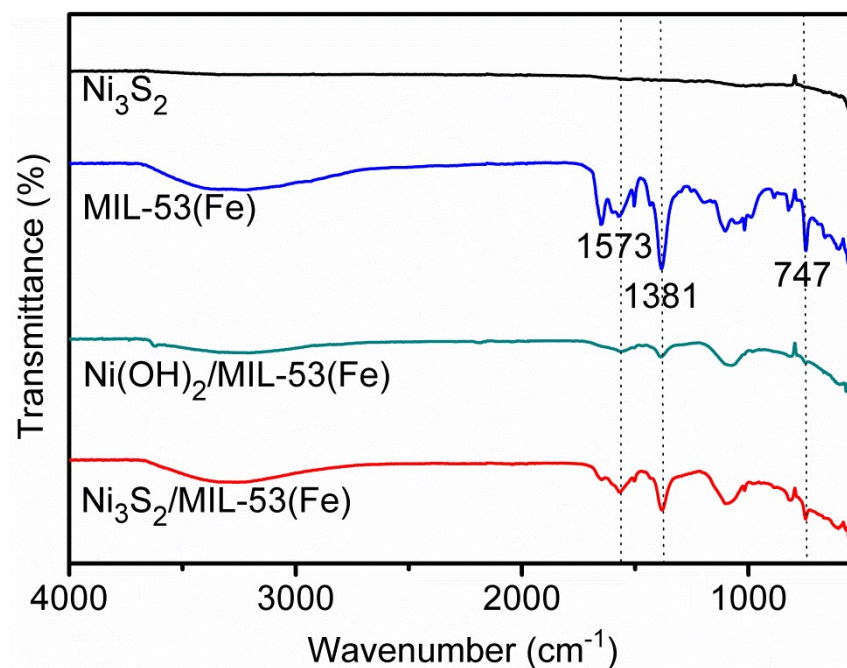

**Fig. S10** FT-IR spectra of  $\text{Ni}_3\text{S}_2$ , MIL-53(Fe),  $\text{Ni}(\text{OH})_2/\text{MIL-53}(\text{Fe})$  and  $\text{Ni}_3\text{S}_2/\text{MIL-53}(\text{Fe})$ .

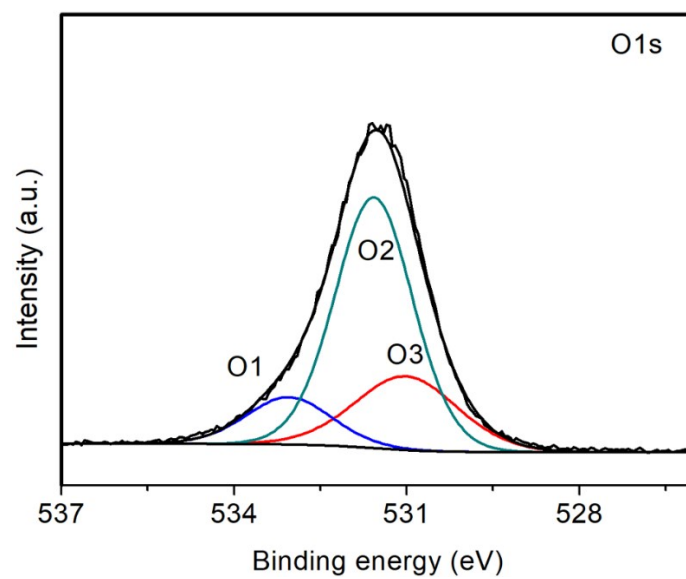

**Fig. S11** High-resolution O 1s XPS spectrum of  $\text{Ni}_3\text{S}_2/\text{MIL-53}(\text{Fe})$ .



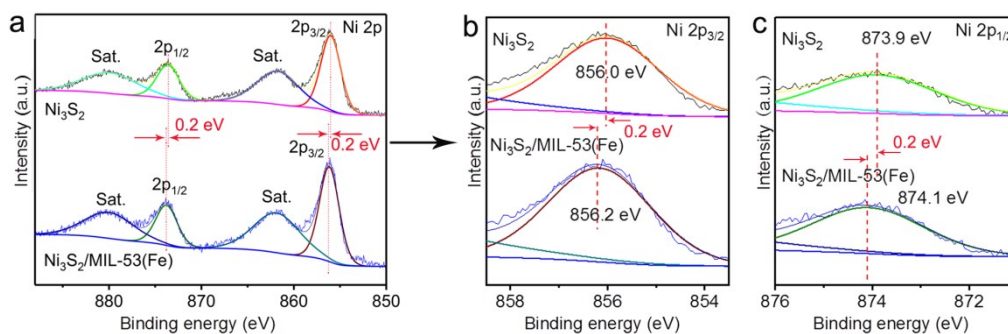

**Fig. S12** XPS spectra of Ni 2p for  $\text{Ni}_3\text{S}_2$  and  $\text{Ni}_3\text{S}_2/\text{MIL-53(Fe)}$ .

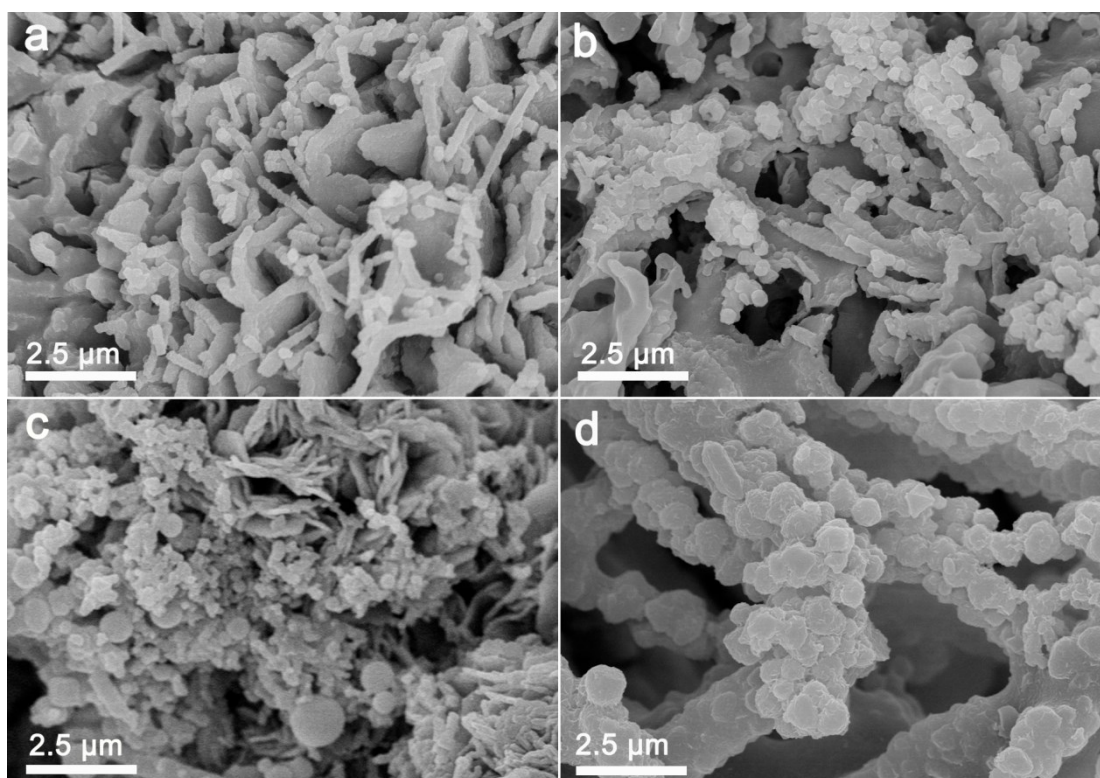

**Fig. S13** SEM images of  $\text{Ni}_3\text{S}_2/\text{MIL-53(Fe)}$  with different hydrothermal time: (a) 1.5 h, (b) 6 h, (c) 9 h, (d) 12 h.

**Note:** The SEM images of the series of  $\text{Ni}_3\text{S}_2/\text{MIL-53(Fe)}$  samples reveal that with the increase of hydrothermal time, bigger and agglomerated MIL-53(Fe) nanoparticles are observed. This can be explained as the continued growth of MOFs.

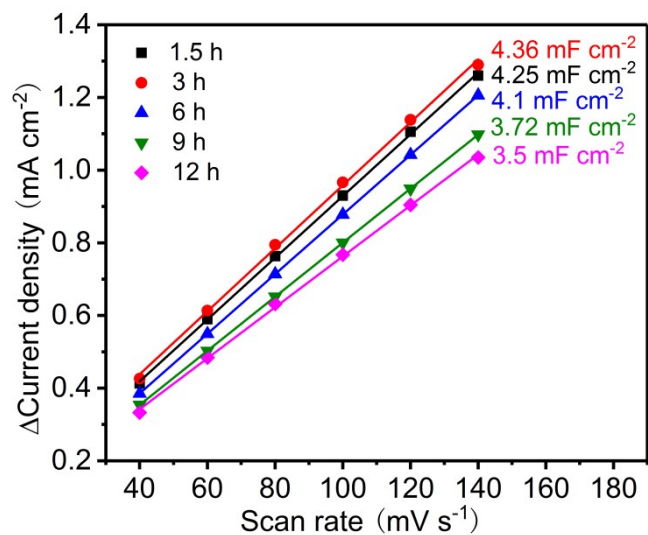

**Fig. S14** The plots of  $\Delta J$  versus scan rates for  $\text{Ni}_3\text{S}_2/\text{MIL-53(Fe)}$  with different hydrothermal time.

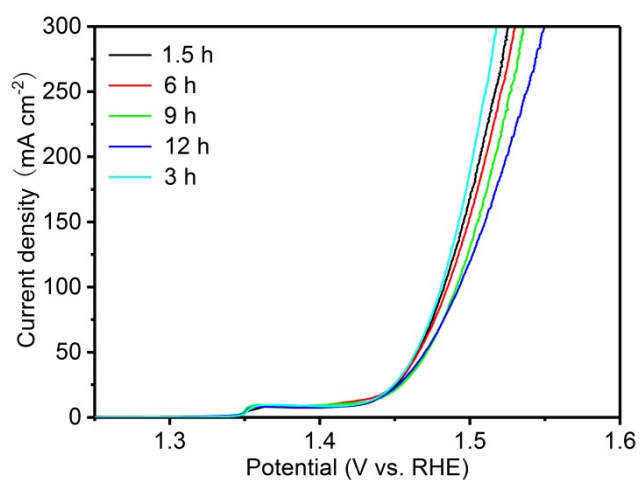

**Fig. S15** Polarization curves of  $\text{Ni}_3\text{S}_2/\text{MIL-53(Fe)}$  with different hydrothermal time.

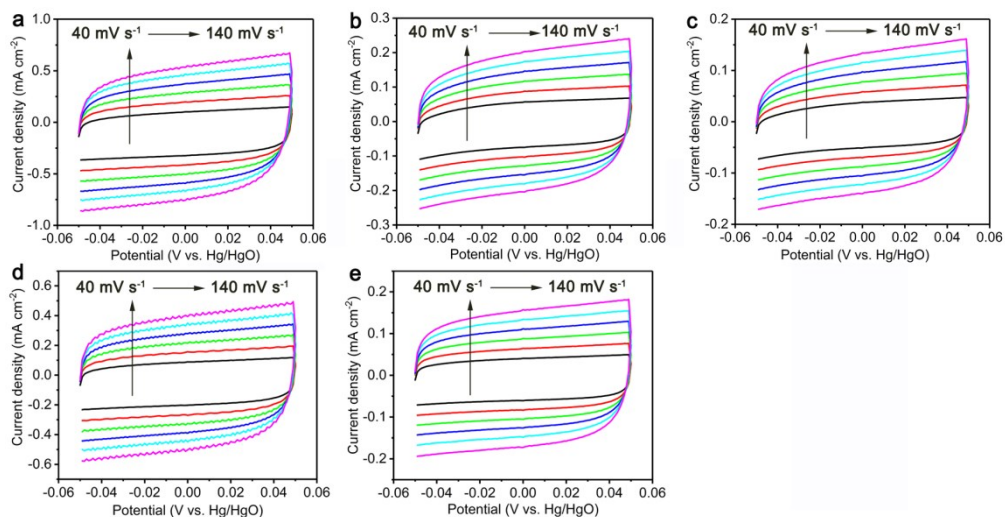

**Fig. S16** CV curves of (a)  $\text{Ni}_3\text{S}_2/\text{MIL-53(Fe)}$ , (b)  $\text{MIL-53(Fe)}$ , (c)  $\text{Ni(OH)}_2/\text{MIL-53(Fe)}$ , (d)  $\text{Ni}_3\text{S}_2$ , and (e)  $\text{Ni(OH)}_2$  at different scan rates in the potential range of  $-0.05$ – $0.05$  V vs. Hg/HgO region.

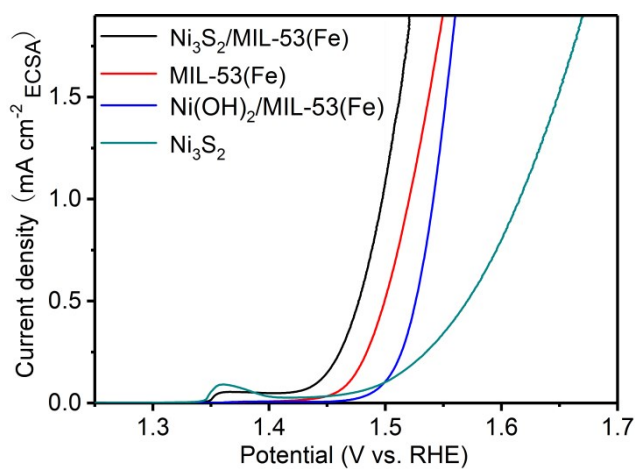

**Fig. S17** ECSA-normalized polarization curves for  $\text{Ni}_3\text{S}_2/\text{MIL-53(Fe)}$ ,  $\text{MIL-53(Fe)}$ ,  $\text{Ni(OH)}_2/\text{MIL-53(Fe)}$  and  $\text{Ni}_3\text{S}_2$ .

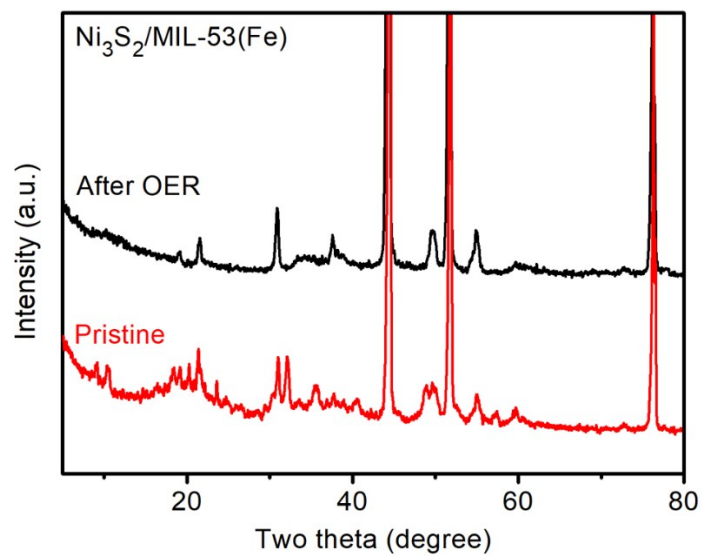

**Fig. S18** XRD patterns of  $\text{Ni}_3\text{S}_2/\text{MIL-53}(\text{Fe})$  before and after OER stability test.

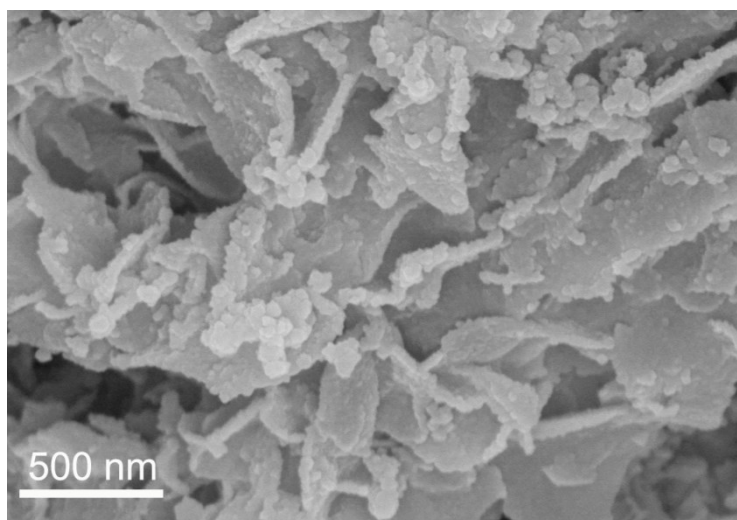

**Fig. S19** SEM image of  $\text{Ni}_3\text{S}_2/\text{MIL-53}(\text{Fe})$  after OER stability test.

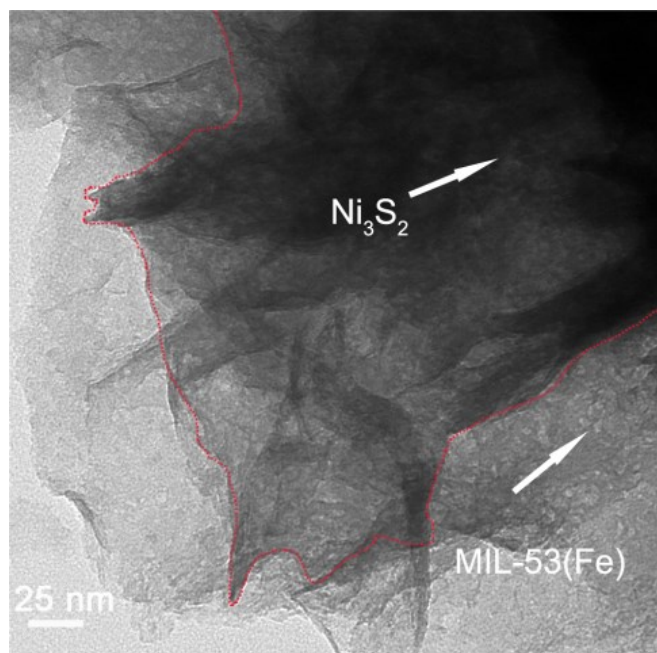

**Fig. S20** TEM image of Ni<sub>3</sub>S<sub>2</sub>/MIL-53(Fe) after OER stability test.

**Note:** After stability test, as shown in **Fig. S20**, it can be seen that the strong color contrast between the inner component and the outer layer is similar to that of the fresh sample, which indicates that the structure of the Ni<sub>3</sub>S<sub>2</sub>/MIL-53(Fe) in micrometer size is maintained. That is, the Ni<sub>3</sub>S<sub>2</sub> is covered by the MIL-53(Fe) layer. Moreover, due to the decomposition of organic ligand of the MOFs during electrocatalytic activity test, many pores will be generated in the MOF structure. This has been demonstrated in MOFs electrocatalysts.<sup>S10</sup> Therefore, it can be deduced that in the TEM image of the used Ni<sub>3</sub>S<sub>2</sub>/MIL-53(Fe), the deep colored part is Ni<sub>3</sub>S<sub>2</sub>, while the light colored part with pores is MIL-53(Fe) layer.

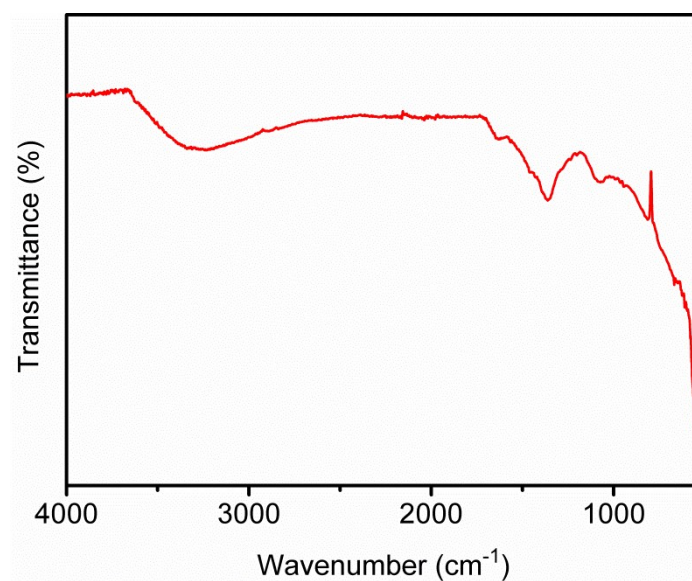

**Fig. S21** FT-IR spectrum of Ni<sub>3</sub>S<sub>2</sub>/MIL-53(Fe) after OER stability test.

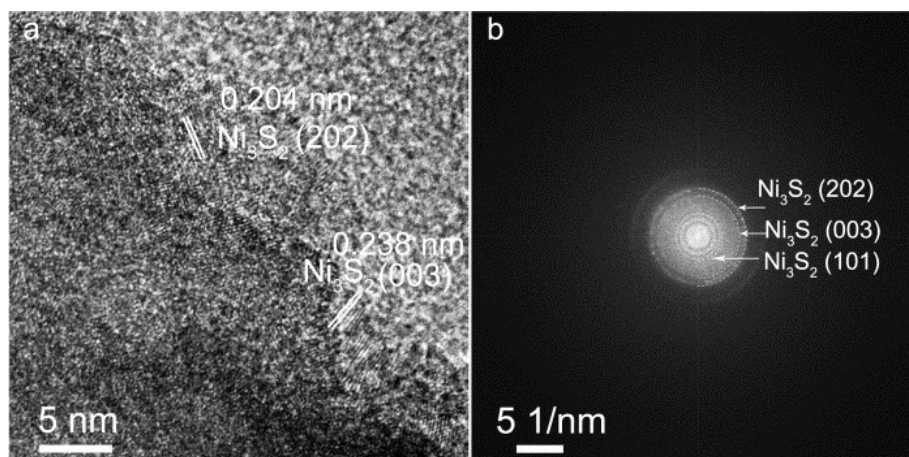

**Fig. S22** (a) HRTEM image, and (b) the corresponding SAED pattern of Ni<sub>3</sub>S<sub>2</sub>/MIL-53(Fe) after OER stability test.

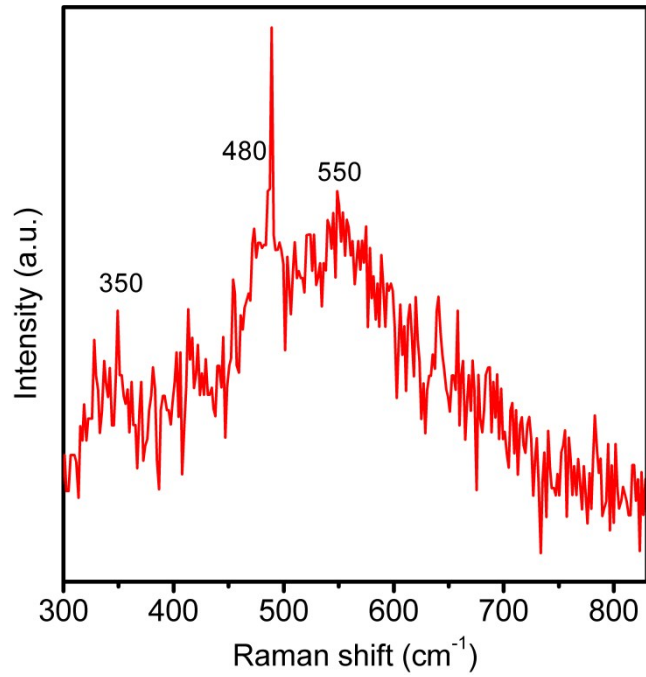

**Fig. S23** Raman spectrum of Ni<sub>3</sub>S<sub>2</sub>/MIL-53(Fe) after OER stability test.

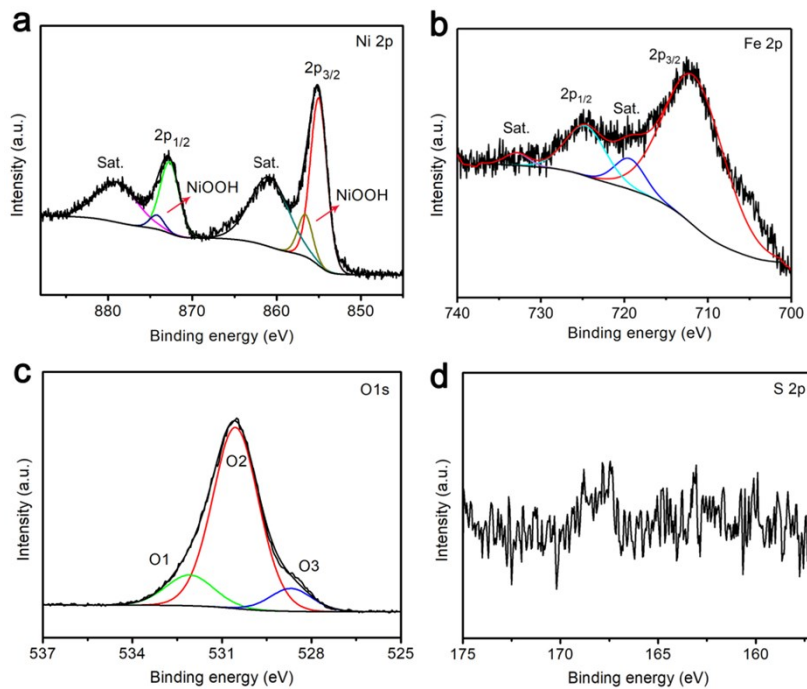

**Fig. S24** High-resolution XPS spectra for the (a) Ni 2p, (b) Fe 2p, (c) O 1s, (d) S 2p of Ni<sub>3</sub>S<sub>2</sub>/MIL-53(Fe) after OER stability test.

**Table S1.** Comparison of OER performance of Ni<sub>3</sub>S<sub>2</sub>/MIL-53(Fe) with various sulfide-based OER electrocatalysts.

| Catalyst                                                             | Electrolyte | $\eta$ @10 mA<br>cm <sup>-2</sup><br>mV | $\eta$ @100<br>mA cm <sup>-2</sup><br>mV | Tafel<br>Slope<br>mV<br>dec <sup>-1</sup> | Stability<br>test | Reference |
|----------------------------------------------------------------------|-------------|-----------------------------------------|------------------------------------------|-------------------------------------------|-------------------|-----------|
| Ni <sub>3</sub> S <sub>2</sub> /MIL-53(Fe)                           | 1 M KOH     | 214                                     | 251                                      | 33.8                                      | 24 h              | This work |
| Ni <sub>2</sub> P-Ni <sub>3</sub> S <sub>2</sub> HNAs/NF             | 1 M KOH     | 210                                     | -                                        | 62                                        | 24 h              | 11        |
| Zn-Ni <sub>3</sub> S <sub>2</sub> /NF                                | 1 M KOH     | -                                       | 330                                      | 87                                        | 20 h              | 12        |
| CoS <sub>2</sub> /Ni <sub>3</sub> S <sub>2</sub> /CoNiO <sub>x</sub> | 1 M KOH     | 256                                     | 300                                      | 43.4                                      | one<br>week       | 13        |
| Fe <sub>7.2%</sub> -Ni <sub>3</sub> S <sub>2</sub> NSs/NF            | 1 M KOH     | 295                                     | -                                        | 71                                        | 10 h              | 14        |
| N-(Ni,Fe) <sub>3</sub> S <sub>2</sub> /NIF                           | 1 M KOH     | 167                                     | -                                        | 33                                        | 50 h              | 15        |
| S-Ni <sub>3</sub> S <sub>2</sub>                                     | 1 M KOH     | 213                                     | 286                                      | 45                                        | 60 h              | 16        |
| Ni <sub>3</sub> S <sub>2</sub> /NF                                   | 1 M KOH     | 312                                     | 430                                      | 111                                       | 14 h              | 17        |
| NiFe/Co <sub>9</sub> S <sub>8</sub> /CC                              | 1 M KOH     | 219                                     | -                                        | 55                                        | 20 h              | 18        |
| Fe-Ni <sub>3</sub> S <sub>2</sub> /NF                                | 1 M KOH     | 214                                     | 249                                      | 42                                        | 10 h              | 19        |
| Ni <sub>3</sub> S <sub>2</sub> /Co <sub>9</sub> S <sub>8</sub>       | 1 M KOH     | -                                       | 340                                      | 66                                        | 12 h              | 20        |
| NiS/NiS <sub>2</sub>                                                 | 1 M KOH     | -                                       | 416                                      | 156.5                                     | 24 h              | 21        |

### Supplementary references

[S1] L.-L. Feng, G. Yu, Y. Wu, G.-D. Li, H. Li, Y. Sun, T. Asefa, W. Chen and X. Zou, *J. Am. Chem. Soc.*, 2015, **137**, 14023-14026.

[S2] N. Jiang, Q. Tang, M. Sheng, B. You, D.-e. Jiang and Y. Sun, *Catal. Sci. Technol.*, 2016, **6**, 1077-1084.

[S3] G. Zhou, H. Tian, Y. Jin, X. Tao, B. Liu, R. Zhang, Z. W. Seh, D. Zhuo, Y. Liu and J. Sun, *Proc. Natl. Acad. Sci. U. S. A.*, 2017, **114**, 840-845.

[S4] H. Shen, L. Zhang and A. Eisenberg, *J. Am. Chem. Soc.*, 1999, **121**, 2728-2740.

[S5] Y.-y. Chen, X.-j. Zhang, H.-m. Yuan, W.-t. Wei and M. Yan, *Chem. Commun.*, 2013, **49**, 10974-10976.

[S6] C. Paulet, T. Loiseau, G. Férey, *J. Mater. Chem.*, 2000, **10**, 1225-1229.

[S7] M. Salavati-Niasari, H. Seyghalkar, O. Amiri, F. Davar, *J. Clust. Sci.*, 2013, **24**, 365-376.

[S8] J. Du, S. Xu, L. Sun, F. Li, *Chem. Commun.*, 2019, **55**, 14773-14776.



- [S9] X. Zhao, B. Pattengale, D. Fan, Z. Zou, Y. Zhao, J. Du, J. Huang and C. Xu, *ACS Energy Lett.*, 2018, **3**, 2520-2526.
- [S10] K. Rui, G. Zhao, Y. Chen, Y. Lin, Q. Zhou, J. Chen, J. Zhu, W. Sun, W. Huang and S. X. Dou, *Adv. Funct. Mater.*, 2018, **28**, 1801554.
- [S11] L. Zeng, K. Sun, X. Wang, Y. Liu, Y. Pan, Z. Liu, D. Cao, Y. Song, S. Liu and C. Liu, *Nano Energy*, 2018, **51**, 26-36.
- [S12] Q. Liu, L. Xie, Z. Liu, G. Du, A. M. Asiri and X. Sun, *Chem. Commun.*, 2017, **53**, 12446-12449.
- [S13] H. Lee, X. Wu, Q. Ye, X. Wu, X. Wang, Y. Zhao and L. Sun, *Chem. Commun.*, 2019, **55**, 1564-1567.
- [S14] Y. Zhu, H. Yang, K. Lan, K. Iqbal, Y. Liu, P. Ma, Z. Zhao, S. Luo, Y. Luo and J. Ma, *Nanoscale*, 2019, **11**, 2355-2365.
- [S15] Y. Jin, X. Yue, H. Du, K. Wang, S. Huang and P. K. Shen, *J. Mater. Chem. A*, 2018, **6**, 5592-5597.
- [S16] H. Zhang, H. Jiang, Y. Hu, Y. Li, Q. Xu, S. Petr and C. Li, *J. Mater. Chem. A*, 2019, **7**, 7548-7552.
- [S17] G. Ren, Q. Hao, J. Mao, L. Liang, H. Liu, C. Liu and J. Zhang, *Nanoscale*, 2018, **10**, 17347-17353.
- [S18] C. Zhan, Z. Liu, Y. Zhou, M. Guo, X. Zhang, J. Tu, L. Ding and Y. Cao, *Nanoscale*, 2019, **11**, 3378-3385.
- [S19] G. Zhang, Y.-S. Feng, W.-T. Lu, D. He, C.-Y. Wang, Y.-K. Li, X.-Y. Wang and F.-F. Cao, *ACS Catal.*, 2018, **8**, 5431-5441.
- [S20] J. Lin, H. Wang, X. Zheng, Y. Du, C. Zhao, J. Qi, J. Cao, W. Fei and J. Feng, *J. Power Sources*, 2018, **401**, 329-335.
- [S21] Q. Li, D. Wang, C. Han, X. Ma, Q. Lu, Z. Xing and X. Yang, *J. Mater. Chem. A*, 2018, **6**, 8233-8237.
